# Supplementary material for: Joint model robustness compared with the time-varying covariate Cox model to evaluate the association between a longitudinal marker and a time-to-event endpoint
Source: Springer Nature journal article supplement (doi:10.1186/s12874-019-0873-y), 2019-12-01
Supplement: MOESM1 [file 17463732]

# Joint model robustness compared with the time-varying covariate Cox model to evaluate the association between a longitudinal marker and a time-to-event endpoint

Maeregu W. Arisido, Laura Antolini, Davide P. Bernasconi,  
Maria G. Valsecchi and Paola Rebora

## Supplementary Appendix

Results of the association parameter  $\alpha$  obtained from the time-varying covariate Cox model (TVCM), two-stage approach and the joint model fitted to data generated considering the linear marker trajectory (scenario 2 of Table 1 in the manuscript with  $\alpha \in (0, 0.3, 0.6)$  and  $\sigma_\epsilon \in (0.1, 0.3, 0.5)$ ). Mean of the maximum likelihood estimates (Est), asymptotic standard error (ASE), bias, percentage bias (%Bias) and 95% coverage probabilities (CP) are shown.

| $\sigma_\epsilon$ | Model       | $\alpha = 0.3$ |       |       |    | $\alpha = 0.6$ |       |       |    |
|-------------------|-------------|----------------|-------|-------|----|----------------|-------|-------|----|
|                   |             | Est            | ASE   | %Bias | CP | Est            | ASE   | %Bias | CP |
| 0.1               | TVCM        | 0.293          | 0.058 | -2.3  | 95 | 0.582          | 0.061 | -3.0  | 93 |
|                   | Two-stage   | 0.285          | 0.059 | -5    | 94 | 0.575          | 0.062 | -4.2  | 92 |
|                   | joint model | 0.301          | 0.058 | 0.3   | 95 | 0.604          | 0.061 | 0.7   | 94 |
| 0.3               | TVCM        | 0.275          | 0.057 | -8.3  | 92 | 0.541          | 0.059 | -9.8  | 83 |
|                   | Two-stage   | 0.280          | 0.06  | -6.7  | 93 | 0.567          | 0.063 | -5.5  | 92 |
|                   | joint model | 0.301          | 0.059 | 0.3   | 95 | 0.604          | 0.064 | 0.7   | 94 |
| 0.5               | TVCM        | 0.244          | 0.053 | -19   | 80 | 0.474          | 0.055 | -21   | 35 |
|                   | Two-stage   | 0.273          | 0.062 | -9    | 92 | 0.547          | 0.065 | -8.8  | 86 |
|                   | joint model | 0.301          | 0.062 | 0.3   | 95 | 0.606          | 0.069 | 1.0   | 94 |
